# Supplementary material for: Antioxidant Activity of Frozen and Freeze-Dried Drone Brood Homogenate Regarding the Stage of Larval Development
Source: MDPI journal article supplement (doi:10.3390/antiox10050639), 2021-04-22
Supplement: s1 [file s1]

**Table S1.** Correlation matrix for frozen and freeze-dried drone brood homogenate.

|      |              | DPPH   |              | ABTS   |              | FRAP   |              | TPC    |              | TFC    |              |
|------|--------------|--------|--------------|--------|--------------|--------|--------------|--------|--------------|--------|--------------|
|      |              | Frozen | Freeze-dried |
| DPPH | Frozen       | 1      |              |        |              |        |              |        |              |        |              |
|      | Freeze-dried | 0.824* | 1            |        |              |        |              |        |              |        |              |
| ABTS | Frozen       | -0.828 | -0.760       | 1      |              |        |              |        |              |        |              |
|      | Freeze-dried | -0.833 | -0.828       | 0.833* | 1            |        |              |        |              |        |              |
| FRAP | Frozen       | 0.914* | 0.876*       | -0.700 | -0.714       | 1      |              |        |              |        |              |
|      | Freeze-dried | 0.865* | 0.814*       | -0.714 | 0.700*       | 0.909* | 1            |        |              |        |              |
| TPC  | Frozen       | 0.929* | 0.892*       | -0.840 | -0.817       | 0.883* | 0.919*       | 1      |              |        |              |
|      | Freeze-dried | 0.871* | 0.929*       | -0.762 | 0.840*       | 0.917* | 0.883*       | 0.935* | 1            |        |              |
| TFC  | Frozen       | 0.838* | 0.911*       | -0.773 | -0.734       | 0.882* | 0.962*       | 0.883* | 0.908*       | 1      |              |
|      | Freeze-dried | 0.823* | 0.838*       | -0.672 | 0.773*       | 0.717* | 0.882*       | 0.749* | 0.883*       | 0.799* | 1            |

\* – Correlation coefficient statistically significant ( $p < 0.05$ ).

**Table S2.** Characterization of chromatographic bands for reference standards, color and intensity of band.

| Standard                 | R <sub>f</sub> | UV <sub>366</sub> color | DPPH<br>derivatization<br>intensity |
|--------------------------|----------------|-------------------------|-------------------------------------|
| <i>p</i> -coumaric acid  | 0.41           | blue                    | ++                                  |
| apigenin-7-<br>glucoside | 0.05           | yellow                  | -                                   |
| ferulic acid             | 0.42           | blue                    | +++                                 |
| naringenin               | 0.52           | yellow                  | +++                                 |
| apigenin                 | 0.43           | yellow                  | +++                                 |
| chrysin                  | 0.63           | pale blue               | ++                                  |

Bands color: + slightly intense; ++ medium intensive; +++ very intense.

**Table S3.** Characterization of chromatographic bands for extracts of drone brood homogenates, color and intensity of band in UV<sub>366</sub> and after derivatization.

| Band number                    |                                    |             | 1             | 2             | 3           | 4         | 5               | 6    |   |
|--------------------------------|------------------------------------|-------------|---------------|---------------|-------------|-----------|-----------------|------|---|
| R <sub>f</sub>                 |                                    |             | 0.09          | 0.22          | 0.30        | 0.33      | 0.45            | 0.80 |   |
| UV <sub>366</sub> color        |                                    |             | blue          | blue          | pale yellow | pale blue | yellow          | blue |   |
| UV <sub>366</sub><br>intensity | I<br>apiary                        | 7- day-old  | +++           | ++            | +           | +         | ++              | ++   |   |
|                                |                                    | 11- day-old | +++           | +             | +           | +         | ++              | +    |   |
|                                |                                    | 14- day-old | ++            | +             | +           | -         | -               | ++   |   |
|                                | II<br>apiary                       | 7- day-old  | +++           | ++            | ++          | +         | ++              | ++   |   |
|                                |                                    | 11- day-old | +++           | ++            | ++          | +++       | ++              | +    |   |
|                                |                                    | 14- day-old | +++           | ++            | +++         | +++       | +++             | ++   |   |
|                                | III<br>apiary                      | 7- day-old  | +++           | ++            | ++          | +++       | ++              | +    |   |
|                                |                                    | 11- day-old | ++            | +             | ++          | ++        | -               | +    |   |
|                                |                                    | 14- day-old | ++            | +             | ++          | ++        | -               | +    |   |
|                                | DPPH<br>derivatization<br>intesity | I<br>apiary | 7- day-old    | ++            | +           | ++        | -               | ++   | - |
|                                |                                    |             | 11- day-old   | ++            | +           | ++        | -               | +    | - |
|                                |                                    |             | 14- day-old   | ++            | +           | +++       | -               | +    | - |
| II<br>apiary                   |                                    | 7- day-old  | +++           | +             | +           | ++        | +++             | ++   |   |
|                                |                                    | 11- day-old | ++            | +             | +           | ++        | +++             | +    |   |
|                                |                                    | 14- day-old | ++            | +             | +           | +++       | +++             | +    |   |
| III<br>apiary                  |                                    | 7- day-old  | +++           | +             | +           | +++       | +++             | ++   |   |
|                                |                                    | 11- day-old | ++            | +             | +           | +         | ++              | +    |   |
|                                |                                    | 14- day-old | ++            | +             | +++         | +         | +               | -    |   |
| Identification                 |                                    |             | phenolic acid | phenolic acid | flavonoid   | ?         | <b>apigenin</b> | ?    |   |

Bands color: + slightly intense; ++ medium intensive; +++ very intense.
